# Supplementary material for: Genomic Surveillance of SARS-CoV-2 Lineages Indicates Early Circulation of P.1 (Gamma) Variant of Concern in Southern Brazil
Source: PubMed Central journal article supplement (PMC8849062; doi:10.1128/spectrum.01511-21), 2022-02-16
Supplement: spectrum01511-21_supp_1_seq8.pdf [file spectrum01511-21_supp_1_seq8.pdf]

## Supplemental Material

### Methodology

#### Sampling and RT-qPCR

The specimens were previously submitted to real-time Reverse Transcriptase Polymerase Chain Reaction (RT-qPCR) testing for two genes of the nucleocapsid protein (N1 and N2) for SARS-CoV-2 (1). A total of 202 SARS-CoV-2 specimens (75 from 2020 and 127 from 2021) were included in the study. Eighty-six of them were selected for a Clinical Trial and 116 were selected as a part of a genomic surveillance study in a tertiary-care hospital which is a COVID-19 referral center in Southern Brazil. All specimens included presented a lower cycle threshold (Ct) value ( $\leq 25.99$ ) of the RT-qPCR assay.

#### Next-generation sequencing

Sequencing libraries were prepared using the CleanPlex SARS-CoV-2 panel (Paragon Genomics, Hayward, United States) protocol for target enrichment and library preparation, following manufacturer instructions ([https://www.paragongenomics.com/wp-content/uploads/2020/03/UG4001-01\\_-CleanPlex-SARS-CoV-2-Panel-User-Guide.pdf](https://www.paragongenomics.com/wp-content/uploads/2020/03/UG4001-01_-CleanPlex-SARS-CoV-2-Panel-User-Guide.pdf)). The resulting libraries were sequenced in Illumina MiSeq (Illumina, San Diego, US). Consensus sequences were generated by the QIASeq SARS-CoV-2 pipeline (QIAGEN CLC Genomics Workbench 21, Germantown, United States) with high quality whole-genome sequence ( $< 6\%$  Ns,  $> 29.8\text{Kb}$ ). The specimens were classified using the Phylogenetic Assignment of Named Global Outbreak Lineages (Pangolin) software tool (v3.1.5) (2) and the sequences were deposited into the GISAID database (Table S1).

#### Genomic Dataset and Bayesian Analyses

The datasets used in Bayesian analyses are described as follows:

Dataset A) SARS-CoV-2 P.1 sequences ( $< 6\%$  Ns;  $> 29.8\text{ kb}$ ) obtained from this study (Table S2;  $n = 33$ ) collected up to February, 2021;

Dataset B) B.1.1.28 sequences ( $< 1\%$  Ns;  $> 29.8\text{ kb}$ ) from Amazonas ( $n=49$ ) and Rio Grande do Sul ( $n=173$ ) available on GISAID; collected between July 1, 2020 to February 1, 2021;

Dataset C) P.1 sequences ( $< 1\%$  Ns;  $> 29.8\text{ kb}$ ) from Amazonas ( $n=127$ ) and Rio Grande do Sul ( $n=4$ ); available on GISAID collected up to February 01, 2021;

Dataset D) Six oldest P.1 sequences ( $< 10\%$  Ns;  $> 29.8\text{ kb}$ ) from other Brazilian states, available on GISAID collected until November 30, 2020.

The datasets B, C and D (Table S2) were reclassified by using the Pangolin v3.1.5 software tool (2,3) and nextclade (4). Strains with a different classification than expected or repeated in the dataset were excluded from the next analyses.

After, the sequences were aligned using MAFFT v7.475 (Kato and Standley 2013) and subjected to maximum likelihood (ML) phylogenetic analysis using IQ-TREE v2.1.3 (5) under the GTR+F+R3 nucleotide substitution model, as selected by the ModelFinder (6) application. Branch support was assessed by the approximate-ratio test based on the Shimodaira–Hasegawa procedure (SHaLRT) with 1000 replicates. The temporal signal was assessed by the regression analysis of the root-to-tip genetic distance against sampling dates using the TempEst v1.5.3 (7).

Bayesian analysis was performed with Bayesian Evolutionary Analysis by Sampling Trees (BEAST) v2.6.5 (8) software package. The tree was reconstructed using a strict molecular clock model, GTR + F + I + G4 nucleotide substitution model, and a non-parametric Bayesian skyline (BSKL) model (9) as the coalescent tree prior. Five independent runs were performed with 150 million MCMC chains. Convergence and mixing samples were performed

using TRACER v1.7.2. (10). The maximum clade credibility (MCC) tree was summarized with TreeAnnotator v2.6.4. All trees built in this study were visualized using FigTree v1.4.4 (<http://tree.bio.ed.ac.uk/software/gtree/>). The ancestral character reconstruction (ACR) of epidemic regions was performed with PastML with Marginal Posterior Probabilities Approximation (MPPA) with an F81-like model (11) and visualized using iTol (12). The Phylogenetic and Bayesian trees were designed using ggtree v3.0.2 (13), treeio v1.16.1 (14) and ggplot2 (15) on R v4.1.0 (R Core Team, 2020). The map (Figure S1) was designed using geobr (16), dplyr v1.0.6 (17) and ggplot2 (15). Root-to-tip (Figure S2) was performed using exported data from TempEst v1.5.3 (7) and designed using ggplot2 (15).

## Supplementary Tables

**Table S1.** Characteristics of sequenced specimens and setting of specimen recovery

| Specimen ID | Date   | City of origin | Age   |  | Ct N1 | Ct N2 | Variant   | Coverage | GISAID ID (EPI_ISL_) |
|-------------|--------|----------------|-------|--|-------|-------|-----------|----------|----------------------|
|             |        |                | Range |  |       |       |           |          |                      |
| 9_HCPA      | Mar-20 | Porto Alegre   | >65   |  | 13.15 | 11.90 | B.1       | 790.9    | 1163693              |
| 10_HCPA     | Mar-20 | Porto Alegre   | 46-55 |  | 16.76 | 15.44 | B.1.1.161 | 1151.3   | 1163694              |
| 11_HCPA     | Mar-20 | Porto Alegre   | 46-55 |  | 16.95 | 17.42 | B.1.1.161 | 521.7    | 1163695              |
| 13_HCPA     | Apr-20 | Porto Alegre   | >65   |  | 16.66 | 16.54 | B.1.1.161 | 1018.3   | 1163696              |
| 14_HCPA     | Apr-20 | Taquari        | 56-65 |  | 17.60 | 17.80 | B.1.1.161 | 888.4    | 1163697              |
| 15_HCPA     | May-20 | Porto Alegre   | 36-45 |  | 15.46 | 14.91 | B.1.1.161 | 1753.7   | 1163698              |
| 16_HCPA     | May-20 | Charqueadas    | 56-65 |  | 14.77 | 14.36 | B.1.1.161 | 848.2    | 1163699              |
| 17_HCPA     | May-20 | Porto Alegre   | 36-45 |  | 18.52 | 19.30 | B.1.1     | 1271.3   | 1163700              |
| 19_HCPA     | Jun-20 | Porto Alegre   | 56-65 |  | 13.54 | 13.22 | B.1.1.161 | 1299.3   | 1163701              |
| 20_HCPA     | Jun-20 | Esteio         | 56-65 |  | 12.30 | 12.81 | B.1.1.161 | 1449.6   | 1163702              |
| 22_HCPA     | Jul-20 | Porto Alegre   | 56-65 |  | 11.17 | 11.01 | B.1.1.409 | 724.9    | 1163703              |
| 23_HCPA     | Jul-20 | Canoas         | 56-65 |  | 13.80 | 13.10 | B.1.1.28  | 981.8    | 1163704              |
| 24_HCPA     | Jul-20 | Taquara        | 36-45 |  | 11.88 | 12.34 | B.1.1.33  | 1651.6   | 1163705              |
| 25_HCPA     | Aug-20 | Butiá          | 46-55 |  | 14.83 | 15.09 | B.1.1.161 | 1813.1   | 1163706              |
| 26_HCPA     | Aug-20 | Porto Alegre   | 56-65 |  | 13.00 | 12.09 | B.1.1.161 | 527.2    | 1163707              |
| 27_HCPA     | Aug-20 | Faria Lemos    | >65   |  | 12.89 | 12.51 | B.1.91    | 712.9    | 1163708              |
| 28_HCPA     | Sep-20 | Unknown        | 36-45 |  | 13.04 | 12.49 | B.1.1.28  | 2104.6   | 1163709              |
| 29_HCPA     | Sep-20 | Guaíba         | 36-45 |  | 14.49 | 14.02 | B.1.1.28  | 1286.9   | 1163710              |
| 30_HCPA     | Sep-20 | Porto Alegre   | 56-55 |  | 15.48 | 15.66 | B.1.1.28  | 1086.1   | 1163711              |
| 31_HCPA     | Oct-20 | Ijuí           | 36-45 |  | 14.20 | 13.96 | B.1.1.28  | 1048.8   | 1163712              |
| 33_HCPA     | Oct-20 | Porto Alegre   | 26-35 |  | 15.40 | 14.30 | B.1.1.161 | 552.6    | 1163736              |
| 34_HCPA     | Nov-20 | Canoas         | 36-45 |  | 22.65 | 24.93 | B.1.1.28  | 578.7    | 1163713              |
| 35_HCPA     | Nov-20 | Viamão         | 56-65 |  | 11.38 | 11.32 | B.1.1.12  | 545.6    | 1163737              |
| 37_HCPA     | Dec-20 | Porto Alegre   | 36-45 |  | 13.82 | 13.14 | P.2       | 542.3    | 1163714              |
| 38_HCPA     | Dec-20 | Viamão         | 36-45 |  | 11.50 | 9.39  | B.1.1.28  | 1194.6   | 1163715              |
| 39_HCPA     | Dec-20 | Porto Alegre   | 46-55 |  | 12.75 | 12.55 | B.1.1.28  | 1090.5   | 1163716              |
| 1_LABRESIS  | Feb-21 | Alvorada       | 36-45 |  | 17.99 | 19.61 | P.1       | 2341     | 1133120              |
| 2_LABRESIS  | Jan-21 | Porto Alegre   | 36-45 |  | 13.65 | 13.41 | B.1.1.28  | 2101     | 1163530              |
| 3_LABRESIS  | Feb-21 | Porto Alegre   | 15-25 |  | 17.43 | 19.11 | P.1       | 2073     | 1133121              |
| 4_LABRESIS  | Feb-21 | Porto Alegre   | 26-35 |  | 11.29 | 12.62 | P.1       | 1945     | 1133134              |
| 5_LABRESIS  | Feb-21 | Viamão         | 26-35 |  | 12.73 | 14.55 | P.1       | 2418     | 1133123              |
| 6_LABRESIS  | Feb-21 | Porto Alegre   | 26-35 |  | 17.14 | 17.85 | P.1.2     | 3070     | 1133124              |
| 7_LABRESIS  | Feb-21 | Porto Alegre   | 15-25 |  | 16.52 | 17.35 | P.1       | 2627     | 1133125              |
| 8_LABRESIS  | Feb-21 | Porto Alegre   | 15-25 |  | 12.57 | 12.82 | P.1       | 2474     | 1133126              |
| 9_LABRESIS  | Feb-21 | Porto Alegre   | 36-45 |  | 17.91 | 17.48 | P.1       | 2247     | 1133127              |
| 10_LABRESIS | Feb-21 | Porto Alegre   | 26-35 |  | 16.26 | 16.88 | P.1       | 2352     | 1133128              |
| 11_LABRESIS | Feb-21 | Porto Alegre   | 26-35 |  | 14.21 | 16.33 | P.1       | 2249     | 1133129              |
| 12_LABRESIS | Feb-21 | Porto Alegre   | 56-65 |  | 11.79 | 11.35 | P.1       | 2708     | 1133130              |

|             |        |              |       |       |       |           |        |         |
|-------------|--------|--------------|-------|-------|-------|-----------|--------|---------|
| 13_LABRESIS | Feb-21 | Porto Alegre | <3    | 19.90 | 19.97 | P.1       | 2403   | 1133131 |
| 14_LABRESIS | Feb-21 | Porto Alegre | <3    | 11.42 | 11.08 | P.1       | 1527   | 1133132 |
| 15_LABRESIS | Jan-21 | Porto Alegre | <3    | 14.37 | 13.24 | B.1.1.28  | 2367   | 1161401 |
| 16_LABRESIS | Jan-21 | Gravataí     | 26-35 | 12.49 | 11.99 | P.1       | 2763   | 1133133 |
| 17_LABRESIS | Jan-21 | Porto Alegre | 26-35 | 17.01 | 17.31 | P.2       | 2331   | 1161402 |
| 18_LABRESIS | Jan-21 | Porto Alegre | 26-35 | 10.98 | 9.80  | P.2       | 2674   | 1161403 |
| 19_LABRESIS | Jan-21 | Gravataí     | <3    | 15.04 | 15.48 | P.2       | 2252   | 1161404 |
| 20_LABRESIS | Jan-21 | Porto Alegre | 26-35 | 16.07 | 15.91 | B.1.575   | 2316   | 1161405 |
| 21_LABRESIS | Jan-21 | Tramandaí    | 26-35 | 12.11 | 12.03 | P.2       | 2268   | 1161406 |
| 22_LABRESIS | Jan-21 | Porto Alegre | 26-35 | 15.52 | 12.50 | P.2       | 1964   | 1161407 |
| 23_LABRESIS | Jan-21 | Porto Alegre | 26-35 | 15.26 | 14.15 | P.2       | 2459   | 1161408 |
| 24_LABRESIS | Jan-21 | Gravataí     | 26-35 | 15.94 | 15.10 | P.2       | 1824   | 1161409 |
| 25_LABRESIS | Jan-21 | Porto Alegre | <3    | 17.30 | 16.80 | P.2       | 2059   | 1163532 |
| 26_LABRESIS | Feb-21 | Porto Alegre | 26-35 | 13.44 | 11.31 | P.1       | 2354   | 1133134 |
| 27_LABRESIS | Jan-21 | Porto Alegre | <3    | 19.15 | 19.32 | B.1.1.28  | 2402   | 1161410 |
| 28_LABRESIS | Jan-21 | Porto Alegre | 56-65 | 14.89 | 15.28 | P.2       | 2517   | 1161411 |
| 30_LABRESIS | Jan-21 | Porto Alegre | <3    | 14.86 | 15.17 | B.1.1.28  | 1822   | 1161412 |
| 31_LABRESIS | Feb-21 | Porto Alegre | 26-35 | 16.17 | 15.67 | P.1       | 2369   | 1133135 |
| 32_LABRESIS | Feb-21 | Porto Alegre | 56-65 | 18.24 | 19.23 | B.1.1.28  | 2691   | 1161413 |
| 33_LABRESIS | Feb-21 | Porto Alegre | 56-65 | 21.67 | 22.29 | B.1.1.161 | 1494   | 1161414 |
| 34_LABRESIS | Feb-21 | Porto Alegre | 46-55 | 10.81 | 10.38 | P.1       | 1729   | 1133136 |
| 35_LABRESIS | Feb-21 | Porto Alegre | 18-25 | 11.56 | 13.14 | P.1       | 2776   | 1133137 |
| 36_LABRESIS | Feb-21 | Porto Alegre | 46-55 | 17.90 | 18.20 | P.1       | 2499   | 1133138 |
| 37_LABRESIS | Feb-21 | Porto Alegre | 26-35 | 16.96 | 16.60 | P.1       | 6764   | 1133139 |
| 39_LABRESIS | Feb-21 | Porto Alegre | 36-45 | 16.10 | 17.50 | P.1       | 2047   | 1133140 |
| 40_LABRESIS | Feb-21 | Porto Alegre | 26-35 | 12.03 | 12.41 | B.1.1.28  | 1977   | 1161415 |
| 41_LABRESIS | Feb-21 | Porto Alegre | 26-35 | 21.77 | 24.62 | P.1       | 2394   | 1133141 |
| 42_LABRESIS | Feb-21 | Porto Alegre | 46-55 | 12.67 | 12.51 | P.1       | 2180   | 1133142 |
| 43_LABRESIS | Feb-21 | Triunfo      | 26-35 | 10.13 | 11.40 | P.1       | 2128   | 1133143 |
| 44_LABRESIS | Feb-21 | Porto Alegre | 36-45 | 17.70 | 18.90 | P.1       | 1880   | 1133144 |
| 69_LABRESIS | Jan-21 | Barão        | 56-65 | 19.17 | 24.38 | P.2       | 2063.6 | 2098666 |
| 70_LABRESIS | Feb-21 | Porto Alegre | 46-55 | 20.53 | 20.27 | P.1       | 1780.6 | 2086585 |
| 71_LABRESIS | Feb-21 | Porto Alegre | 56-65 | 18.85 | 19.45 | P.2       | 2101.9 | 2086586 |
| 72_LABRESIS | Feb-21 | Porto Alegre | 46-55 | 14.75 | 15.35 | P.1       | 1781.4 | 2086587 |
| 73_LABRESIS | Feb-21 | Guaíba       | 15-25 | 17.68 | 18.58 | P.1       | 1872.3 | 2086588 |
| 74_LABRESIS | Feb-21 | Porto Alegre | 15-25 | 19.37 | 22.23 | P.1       | 1160.5 | 2086589 |
| 75_LABRESIS | Feb-21 | Porto Alegre | 56-65 | 24.83 | 25.87 | P.1       | 353.5  | 2086763 |
| 76_LABRESIS | Feb-21 | Porto Alegre | 15-25 | 21.13 | 21.27 | P.1.1     | 2058.2 | 2086590 |
| 77_LABRESIS | Feb-21 | Gravataí     | 56-65 | 19.39 | 19.15 | P.1.1     | 624.5  | 2086764 |
| 78_LABRESIS | Feb-21 | Canoas       | 26-35 | 20.28 | 20.14 | P.1       | 1756.5 | 2086591 |
| 79_LABRESIS | Feb-21 | Porto Alegre | 46-55 | 19.37 | 19.38 | P.1       | 1493.3 | 2086592 |
| 80_LABRESIS | Feb-21 | Porto Alegre | 36-45 | 12.80 | 19.15 | P.1       | 2001.7 | 2086593 |
| 81_LABRESIS | Mar-21 | Porto Alegre | 56-65 | 17.33 | 18.43 | P.1       | 1649.7 | 2086594 |
| 82_LABRESIS | Mar-21 | Porto Alegre | 26-35 | 18.99 | 19.59 | P.1       | 1894.8 | 2086595 |
| 83_LABRESIS | Mar-21 | Viamão       | 46-55 | 17.80 | 18.02 | P.1       | 2723.5 | 2086596 |
| 84_LABRESIS | Mar-21 | Alvorada     | 56-65 | 20.29 | 20.20 | P.1       | 2130.4 | 2086597 |
| 85_LABRESIS | Mar-21 | Viamão       | 46-55 | 21.39 | 21.06 | P.1       | 1948.7 | 2086598 |
| 86_LABRESIS | Mar-21 | Porto Alegre | 15-25 | 18.24 | 19.66 | P.1       | 1943.7 | 2086599 |
| 87_LABRESIS | Mar-21 | Porto Alegre | 46-55 | 19.76 | 20.79 | P.1       | 1780.9 | 2086600 |
| 88_LABRESIS | Mar-21 | Chuívisca    | 36-45 | 19.00 | 19.75 | P.2       | 2113.6 | 2086601 |
| 89_LABRESIS | Mar-21 | Porto Alegre | 56-65 | 20.08 | 20.87 | P.1       | 2900.1 | 2086602 |
| 90_LABRESIS | Mar-21 | Porto Alegre | 46-55 | 25.12 | 25.34 | P.1.2     | 1276.1 | 2086603 |

|              |        |                  |       |       |       |           |        |         |
|--------------|--------|------------------|-------|-------|-------|-----------|--------|---------|
| 91_LABRESIS  | Mar-21 | Porto Alegre     | 56-65 | 15.00 | 16.10 | P.1       | 2231   | 2086604 |
| 92_LABRESIS  | Mar-21 | Porto Alegre     | 36-45 | 15.19 | 14.28 | P.1       | 1972.5 | 2086605 |
| 93_LABRESIS  | Mar-21 | Porto Alegre     | 26-35 | 23.73 | 23.59 | P.1       | 1149.1 | 2086606 |
| 94_LABRESIS  | Mar-21 | Parobé           | 46-55 | 14.30 | 15.60 | P.1       | 1864.3 | 2086607 |
| 96_LABRESIS  | Mar-21 | Porto Alegre     | 56-65 | 24.17 | 25.99 | P.1       | 1153.7 | 2086608 |
| 98_LABRESIS  | Mar-21 | Porto Alegre     | 46-55 | 15.38 | 15.12 | P.1       | 1329.2 | 2086609 |
| 100_LABRESIS | Apr-21 | Porto Alegre     | 56-65 | 21.74 | 21.24 | P.1       | 1201.1 | 2086610 |
| 101_LABRESIS | Apr-21 | Porto Alegre     | 46-55 | 20.48 | 20.11 | P.1.2     | 1689.4 | 2086611 |
| 102_LABRESIS | Apr-21 | Porto Alegre     | 46-55 | 18.08 | 19.39 | P.1       | 1815.1 | 2086612 |
| 103_LABRESIS | Apr-21 | Alvorada         | 56-65 | 23.06 | 23.03 | P.1       | 634.3  | 2086765 |
| 104_LABRESIS | Apr-21 | Porto Alegre     | 36-45 | 15.19 | 19.45 | P.1       | 2141.8 | 2086613 |
| 105_LABRESIS | Apr-21 | Porto Alegre     | 26-35 | 15.73 | 15.52 | P.1       | 2981.6 | 2086614 |
| 106_LABRESIS | Apr-21 | Porto Alegre     | 56-65 | 20.04 | 20.03 | P.1       | 1697.7 | 2086615 |
| 107_LABRESIS | Apr-21 | Porto Alegre     | 46-55 | 22.79 | 22.98 | P.1       | 1695   | 2086616 |
| 108_LABRESIS | Apr-21 | Porto Alegre     | 26-35 | 15.10 | 15.20 | P.1       | 1984.3 | 2086617 |
| 109_LABRESIS | Apr-21 | Porto Alegre     | 56-65 | 14.98 | 16.35 | P.1       | 2061.5 | 2086618 |
| 110_LABRESIS | Apr-21 | Porto Alegre     | 36-45 | 19.74 | 18.55 | P.1       | 1895.7 | 2086619 |
| 112_LABRESIS | Apr-21 | Porto Alegre     | 56-65 | 22.94 | 24.79 | P.1       | 2040.3 | 2086620 |
| 113_LABRESIS | Apr-21 | Porto Alegre     | 46-55 | 17.12 | 16.58 | P.1       | 2620.8 | 2086621 |
| 114_LABRESIS | Apr-21 | Alvorada         | 56-65 | 23.33 | 22.85 | P.1       | 3517   | 2086622 |
| 116_LABRESIS | Apr-21 | Canoas           | 56-65 | 22.54 | 21.81 | P.1       | 2967.5 | 2086767 |
| 117_LABRESIS | Jun-20 | Porto Alegre     | 36-45 | 17.49 | 18.35 | B.1.1.161 | 1747.3 | 3218208 |
| 118_LABRESIS | Jun-20 | Porto Alegre     | 46-55 | 18.81 | 20.44 | B.1.1.161 | 1971.8 | 3218210 |
| 119_LABRESIS | Jun-20 | Porto Alegre     | 46-55 | 21.36 | 21.93 | B.1.91    | 1656.4 | 3218212 |
| 121_LABRESIS | Jun-20 | Porto Alegre     | 36-45 | 20.41 | 21.35 | B.1.1.28  | 1011.7 | 3218215 |
| 122_LABRESIS | Jun-20 | Porto Alegre     | 56-65 | 21.18 | 21.63 | B.1.91    | 1690.1 | 3218217 |
| 123_LABRESIS | Jun-20 | Gravataí         | 46-55 | 21.90 | 22.09 | B.1.1.28  | 1643.3 | 3218219 |
| 124_LABRESIS | Jun-20 | Porto Alegre     | 56-65 | 23.87 | 23.85 | B.1.1.161 | 1287.2 | 3218221 |
| 125_LABRESIS | Jul-20 | Porto Alegre     | 26-35 | 20.94 | 22.59 | B.1.1.28  | 1424.4 | 3218222 |
| 126_LABRESIS | Jul-20 | Porto Alegre     | 56-65 | 14.17 | 17.61 | B.1.91    | 2301.9 | 3218224 |
| 127_LABRESIS | Jul-20 | Barra do Ribeiro | 56-65 | 14.56 | 14.49 | B.1.1.161 | 1763.2 | 3218226 |
| 128_LABRESIS | Jul-20 | Porto Alegre     | 56-65 | 15.67 | 16.32 | B.1.1.161 | 1791.1 | 3218228 |
| 129_LABRESIS | Jul-20 | Porto Alegre     | 18-25 | 18.47 | 18.70 | B.1.1     | 1671.5 | 3218229 |
| 130_LABRESIS | Aug-20 | Porto Alegre     | 26-35 | 13.37 | 13.60 | B.1.161   | 1980.2 | 3218231 |
| 131_LABRESIS | Aug-20 | Camaquã          | 56-65 | 22.43 | 22.71 | B.1.28    | 1063.7 | 3218233 |
| 133_LABRESIS | Aug-20 | Porto Alegre     | 56-65 | 21.51 | 21.87 | B.1.28    | 1453.6 | 3218235 |
| 134_LABRESIS | Aug-20 | Gravataí         | 56-65 | 19.96 | 19.30 | B.1.1.409 | 1996.8 | 3218237 |
| 135_LABRESIS | Aug-20 | Porto Alegre     | 46-55 | 22.07 | 21.29 | B.1.1.462 | 1672.7 | 3218238 |
| 136_LABRESIS | Aug-20 | Porto Alegre     | 56-65 | 23.27 | 23.50 | B.1.1.28  | 1761.5 | 3218240 |
| 137_LABRESIS | Aug-20 | Canoas           | 56-65 | 23.64 | 23.23 | B.1.1.161 | 1679.8 | 3218242 |
| 138_LABRESIS | Aug-20 | Porto Alegre     | 56-65 | 21.14 | 20.33 | B.1.1.161 | 2270.8 | 3218244 |
| 139_LABRESIS | Aug-20 | Gravataí         | 36-45 | 19.70 | 19.08 | B.1.1.161 | 2707.8 | 3218245 |
| 141_LABRESIS | Aug-20 | Portão           | 46-55 | 22.83 | 23.90 | B.1.1.33  | 879.1  | 3218247 |
| 142_LABRESIS | Aug-20 | Viamão           | 46-55 | 11.27 | 11.73 | B.1.1.161 | 2818.6 | 3218249 |
| 143_LABRESIS | Sep-20 | Porto Alegre     | 46-55 | 24.54 | 25.00 | B.1.1     | 1275.4 | 3218251 |
| 144_LABRESIS | Sep-20 | Canoas           | 56-65 | 20.38 | 21.04 | B.1.1.161 | 1484   | 3218253 |
| 145_LABRESIS | Sep-20 | Porto Alegre     | 56-65 | 22.69 | 21.93 | B.1.1.28  | 1279.7 | 3218254 |
| 146_LABRESIS | Sep-20 | Eldorado do Sul  | 46-55 | 20.22 | 20.09 | B.1.1.28  | 1385.1 | 3218256 |
| 147_LABRESIS | Sep-20 | Porto Alegre     | 36-45 | 23.3  | 23.97 | B.1.1.28  | 912.3  | 3218258 |
| 148_LABRESIS | Oct-20 | Porto Alegre     | 36-45 | 25.69 | 18.12 | B.1.1.161 | 1772.6 | 3218259 |
| 149_LABRESIS | Oct-20 | Porto Alegre     | 36-45 | 20.64 | 18.90 | B.1.1.33  | 1996.1 | 3233183 |
| 150_LABRESIS | Oct-20 | Porto Alegre     | 36-45 | 21.36 | 20.12 | B.1.1.370 | 2628   | 3218261 |

|              |        |                     |       |       |       |           |        |         |
|--------------|--------|---------------------|-------|-------|-------|-----------|--------|---------|
| 151_LABRESIS | Oct-20 | Novo Hamburgo       | 56-65 | 18.09 | 19.22 | B.1.1.161 | 2358   | 3218263 |
| 152_LABRESIS | Oct-20 | Porto Alegre        | 18-25 | 24.3  | 24.39 | B.1.1     | 1684.4 | 3218265 |
| 153_LABRESIS | Oct-20 | Porto Alegre        | 56-65 | 19.24 | 18.45 | B.1.1     | 2812   | 3218266 |
| 154_LABRESIS | Oct-20 | Portão              | 56-65 | 24.10 | 25.60 | B.1.1.33  | 1610.9 | 3218268 |
| 157_LABRESIS | Nov-20 | Porto Alegre        | 46-55 | 22.31 | 22.71 | B.1.1.28  | 1656.8 | 3218270 |
| 158_LABRESIS | Nov-20 | Porto Alegre        | 56-65 | 17.69 | 16.81 | B.1.1.28  | 2550.6 | 3218271 |
| 159_LABRESIS | Nov-20 | Alvorada            | 56-65 | 23.99 | 22.86 | P.2       | 1915.4 | 3218273 |
| 160_LABRESIS | Nov-20 | Porto Alegre        | 46-55 | 22.37 | 22.53 | B.1.1.28  | 1925.4 | 3218275 |
| 161_LABRESIS | Nov-20 | Cachoeirinha        | 46-55 | 20.64 | 19.68 | B.1.1.28  | 3103.1 | 3218277 |
| 162_LABRESIS | Nov-20 | Porto Alegre        | 56-65 | 17.42 | 17.13 | B.1.1.28  | 4792.9 | 3218278 |
| 163_LABRESIS | Nov-20 | Taquara             | 56-65 | 18.86 | 18.71 | B.1.1     | 2824.4 | 3218280 |
| 164_LABRESIS | Nov-20 | Alvorada            | 46-55 | 21.41 | 22.33 | P.1       | 1440.9 | 3233232 |
| 165_LABRESIS | Mar-20 | Porto Alegre        | 56-65 | 22.17 | 25.94 | B.1.1.28  | 3164.1 | 2617875 |
| 166_LABRESIS | Aug-20 | Porto Alegre        | 56-65 | 25.07 | 24.49 | B.1.1.28  | 1767.2 | 2617876 |
| 167_LABRESIS | Nov-20 | Palmares do Sul     | 46-55 | 19.32 | 20.34 | P.2       | 3106.1 | 2617877 |
| 169_LABRESIS | Dec-20 | Porto Alegre        | 15-25 | 17.17 | 15.83 | B.1.1.161 | 3542.6 | 2617878 |
| 170_LABRESIS | Dec-20 | Viamão              | 26-32 | 25.11 | 24.18 | B.1.1.28  | 2230.2 | 2617879 |
| 171_LABRESIS | May-21 | Porto Alegre        | 36-45 | 11.93 | 8.88  | P.1       | 2852.9 | 2617880 |
| 172_LABRESIS | May-21 | Porto Alegre        | 46-55 | 19.21 | 18.44 | P.1       | 3489.5 | 2617881 |
| 173_LABRESIS | May-21 | Porto Alegre        | 46-55 | 24.77 | 23.79 | P.1       | 536.3  | 2617882 |
| 175_LABRESIS | May-21 | Porto Alegre        | 56-65 | 18.67 | 19.99 | P.1       | 1628   | 2617883 |
| 176_LABRESIS | May-21 | Viamão              | 26-35 | 14.51 | 14.70 | P.1       | 2068.6 | 2617884 |
| 177_LABRESIS | May-21 | Porto Alegre        | 26-35 | 18.10 | 14.54 | P.1       | 2097.1 | 2617885 |
| 178_LABRESIS | May-21 | Porto Alegre        | 56-65 | 21.14 | 19.94 | P.1       | 1704.1 | 2617886 |
| 179_LABRESIS | May-21 | Canoas              | 26-35 | 17.12 | 16.74 | P.1       | 1646.6 | 2617887 |
| 180_LABRESIS | May-21 | Porto Alegre        | 36-45 | 13.15 | 12.75 | P.1       | 2159.3 | 2617888 |
| 181_LABRESIS | May-21 | Canoas              | 36-45 | 13.48 | 14.15 | P.1       | 2418.4 | 2617889 |
| 182_LABRESIS | May-21 | Porto Alegre        | 36-45 | 14.35 | 14.51 | P.1       | 2679.9 | 2617890 |
| 183_LABRESIS | May-21 | Porto Alegre        | 56-65 | 17.94 | 17.80 | P.1       | 2583.8 | 2617891 |
| 184_LABRESIS | May-21 | Nova Petrópolis     | 36-45 | 15.46 | 16.25 | P.1       | 3310.3 | 2617892 |
| 185_LABRESIS | May-21 | Porto Alegre        | 36-45 | 12.27 | 13.00 | P.1       | 2751.8 | 2617893 |
| 186_LABRESIS | May-21 | Canoas              | 46-55 | 15.13 | 14.55 | P.1       | 2903.6 | 2617894 |
| 187_LABRESIS | May-21 | Panambi             | 46-55 | 12.92 | 12.10 | P.1       | 2459.5 | 2617895 |
| 188_LABRESIS | May-21 | Porto Alegre        | 46-55 | 13.52 | 12.95 | P.1       | 2887.1 | 2617896 |
| 189_LABRESIS | May-21 | Porto Alegre        | 26-35 | 10.70 | 10.90 | P.1       | 2237.9 | 2617897 |
| 190_LABRESIS | May-21 | Porto Alegre        | 46-55 | 12.90 | 19.90 | P.1       | 2221.3 | 2617898 |
| 191_LABRESIS | May-21 | Sapucaia do Sul     | 56-65 | 10.20 | 9.00  | P.1       | 1783.7 | 2617899 |
| 192_LABRESIS | May-21 | Porto Alegre        | 56-65 | 18.90 | 19.00 | P.1       | 2194.1 | 2617900 |
| 193_LABRESIS | May-21 | Porto Alegre        | 56-65 | 15.43 | 13.92 | P.1       | 2126.1 | 2617901 |
| 194_LABRESIS | May-21 | Porto Alegre        | 46-55 | 15.14 | 14.84 | P.1       | 3254.7 | 2617902 |
| 195_LABRESIS | May-21 | Porto Alegre        | 26-35 | 16.33 | 14.40 | P.1.2     | 1904.2 | 2617903 |
| 196_LABRESIS | May-21 | Porto Alegre        | 36-45 | 14.19 | 14.41 | P.1       | 2135.9 | 2617904 |
| 197_LABRESIS | May-21 | Porto Alegre        | 36-45 | 14.77 | 15.14 | P.1       | 3047.5 | 2617905 |
| 198_LABRESIS | May-21 | Porto Alegre        | 46-55 | 16.92 | 16.52 | P.1.2     | 2965.5 | 2617906 |
| 199_LABRESIS | May-21 | Santa Maria         | 36-45 | 18.71 | 17.65 | P.1       | 2905   | 2617907 |
| 200_LABRESIS | May-21 | Canoas              | 26-35 | 16.67 | 15.28 | P.1       | 3038   | 2617908 |
| 201_LABRESIS | May-21 | São Lourenço do Sul | 46-55 | 14.44 | 15.24 | P.1       | 3347.6 | 2617909 |
| 202_LABRESIS | May-21 | Canoas              | 26-35 | 13.18 | 13.85 | P.1       | 3768.4 | 2617910 |
| 203_LABRESIS | May-21 | Itaqui              | 15-25 | 16.48 | 16.56 | C.37      | 3142.8 | 2617911 |
| 204_LABRESIS | May-21 | Porto Alegre        | 36-45 | 18.18 | 18.48 | P.1       | 3237.9 | 2617912 |
| 205_LABRESIS | May-21 | Porto Alegre        | 26-35 | 21.87 | 22.36 | P.1       | 2970.8 | 2617913 |
| 206_LABRESIS | May-21 | Canoas              | 15-25 | 11.54 | 10.83 | P.1       | 2943.3 | 2617914 |
| 207_LABRESIS | May-21 | Sapiranga           | 46-55 | 19.42 | 18.74 | P.1       | 2531.7 | 2617915 |
| 208_LABRESIS | May-21 | Porto Alegre        | 46-55 | 13.00 | 15.93 | P.1       | 3010.2 | 2617916 |

|              |        |              |       |       |       |       |        |         |
|--------------|--------|--------------|-------|-------|-------|-------|--------|---------|
| 209_LABRESIS | May-21 | Porto Alegre | 46-55 | 11.15 | 10.47 | P.1   | 3509.1 | 2617917 |
| 210_LABRESIS | May-21 | Ibirubá      | 26-35 | 19.72 | 19.02 | P.1   | 2909.5 | 2617918 |
| 211_LABRESIS | May-21 | Viamão       | 56-65 | 18.31 | 17.78 | P.1.2 | 2567.6 | 2617919 |
| 212_LABRESIS | May-21 | Porto Alegre | 36-45 | 13.47 | 12.75 | P.1   | 2507.8 | 2617920 |

\*Cycle threshold (Ct) values obtained by RT-qPCR assay using the two genes of the nucleocapsid protein, N1 and N2, as targets according to CDC/USA protocol.

**Table S2.** Dataset sequences A, B, C and D used for Bayesian analysis.

|           |                 |                                    |
|-----------|-----------------|------------------------------------|
| Dataset A | EPI_ISL_1133120 | hCoV-19/Brazil/RS-1RCSHCPA/2021    |
|           | EPI_ISL_1133121 | hCoV-19/Brazil/RS-3BPCHCPA/2021    |
|           | EPI_ISL_1133122 | hCoV-19/Brazil/RS-4BOGHCPA/2021    |
|           | EPI_ISL_1133123 | hCoV-19/Brazil/RS-5DSTHCPA/2021    |
|           | EPI_ISL_1133125 | hCoV-19/Brazil/RS-7RMSGHCPA/2021   |
|           | EPI_ISL_1133126 | hCoV-19/Brazil/RS-8IKRSHCPA/2021   |
|           | EPI_ISL_1133127 | hCoV-19/Brazil/RS-9JMMHCPA/2021    |
|           | EPI_ISL_1133128 | hCoV-19/Brazil/RS-10EFMHCPA/2021   |
|           | EPI_ISL_1133129 | hCoV-19/Brazil/RS-11AGHCPA/2021    |
|           | EPI_ISL_1133130 | hCoV-19/Brazil/RS-12ACAHCPA/2021   |
|           | EPI_ISL_1133131 | hCoV-19/Brazil/RS-13VVBVHCPA/2021  |
|           | EPI_ISL_1133132 | hCoV-19/Brazil/RS-14MBMHCPA/2021   |
|           | EPI_ISL_1133133 | hCoV-19/Brazil/RS-16JMHCPA/2021    |
|           | EPI_ISL_1133134 | hCoV-19/Brazil/RS-26MRHCPA/2021    |
|           | EPI_ISL_1133135 | hCoV-19/Brazil/RS-31AWDHCPA/2021   |
|           | EPI_ISL_1133136 | hCoV-19/Brazil/RS-34VAMHCPA/2021   |
|           | EPI_ISL_1133137 | hCoV-19/Brazil/RS-35ASMHCPA/2021   |
|           | EPI_ISL_1133138 | hCoV-19/Brazil/RS-36FPPHCPA/2021   |
|           | EPI_ISL_1133139 | hCoV-19/Brazil/RS-37MMCHCPA/2021   |
|           | EPI_ISL_1133140 | hCoV-19/Brazil/RS-39SMHHCPA/2021   |
|           | EPI_ISL_1133141 | hCoV-19/Brazil/RS-41LNPLHCPA/2021  |
|           | EPI_ISL_1133142 | hCoV-19/Brazil/RS-42JBAHCPA/2021   |
|           | EPI_ISL_1133143 | hCoV-19/Brazil/RS-43RPAMHCPA/2021  |
|           | EPI_ISL_1133144 | hCoV-19/Brazil/RS-44JSLHCPA/2021   |
|           | EPI_ISL_2086585 | hCoV-19/Brazil/RS-70_LABRESIS/2021 |
|           | EPI_ISL_2086587 | hCoV-19/Brazil/RS-72_LABRESIS/2021 |
|           | EPI_ISL_2086588 | hCoV-19/Brazil/RS-73_LABRESIS/2021 |
|           | EPI_ISL_2086589 | hCoV-19/Brazil/RS-74_LABRESIS/2021 |
|           | EPI_ISL_2086591 | hCoV-19/Brazil/RS-78_LABRESIS/2021 |
|           | EPI_ISL_2086592 | hCoV-19/Brazil/RS-79_LABRESIS/2021 |

|           |                 |                                           |
|-----------|-----------------|-------------------------------------------|
|           | EPI_ISL_2086593 | hCoV-19/Brazil/RS-80_LABRESIS/2021        |
|           | EPI_ISL_2086763 | hCoV-19/Brazil/RS-LABRESIS-75/2021        |
|           | EPI_ISL_3233232 | hCoV-19/Brazil/RS-164_LABRESIS/2020       |
| Dataset B | EPI_ISL_1068089 | hCoV-19/Brazil/AM-FIOCRUZ-20141355VB/2020 |
|           | EPI_ISL_1068090 | hCoV-19/Brazil/AM-FIOCRUZ-20141399MC/2020 |
|           | EPI_ISL_1068093 | hCoV-19/Brazil/AM-FIOCRUZ-20141562YS/2020 |
|           | EPI_ISL_1068095 | hCoV-19/Brazil/AM-FIOCRUZ-20141671CB/2020 |
|           | EPI_ISL_1068096 | hCoV-19/Brazil/AM-FIOCRUZ-20141721RM/2020 |
|           | EPI_ISL_1068101 | hCoV-19/Brazil/AM-FIOCRUZ-20142153MO/2020 |
|           | EPI_ISL_1068102 | hCoV-19/Brazil/AM-FIOCRUZ-20142189LL/2020 |
|           | EPI_ISL_1068107 | hCoV-19/Brazil/AM-FIOCRUZ-20142424SS/2020 |
|           | EPI_ISL_1068127 | hCoV-19/Brazil/AM-FIOCRUZ-20842451CN/2020 |
|           | EPI_ISL_1068132 | hCoV-19/Brazil/AM-FIOCRUZ-20842572LS/2020 |
|           | EPI_ISL_1068134 | hCoV-19/Brazil/AM-FIOCRUZ-20842652AF/2020 |
|           | EPI_ISL_1068135 | hCoV-19/Brazil/AM-FIOCRUZ-20842657BJ/2020 |
|           | EPI_ISL_1068137 | hCoV-19/Brazil/AM-FIOCRUZ-20842695EA/2020 |
|           | EPI_ISL_1068146 | hCoV-19/Brazil/AM-FIOCRUZ-20842986CO/2020 |
|           | EPI_ISL_1068148 | hCoV-19/Brazil/AM-FIOCRUZ-20843023JA/2020 |
|           | EPI_ISL_1068152 | hCoV-19/Brazil/AM-FIOCRUZ-20843242IB/2020 |
|           | EPI_ISL_1068161 | hCoV-19/Brazil/AM-FIOCRUZ-20843383RG/2020 |
|           | EPI_ISL_1068190 | hCoV-19/Brazil/AM-FIOCRUZ-20890297AX/2020 |
|           | EPI_ISL_1068192 | hCoV-19/Brazil/AM-FIOCRUZ-20890511ME/2020 |
|           | EPI_ISL_1068205 | hCoV-19/Brazil/AM-FIOCRUZ-20891452AC/2020 |
|           | EPI_ISL_1068206 | hCoV-19/Brazil/AM-FIOCRUZ-20891505PT/2020 |
|           | EPI_ISL_1068208 | hCoV-19/Brazil/AM-FIOCRUZ-20891515LA/2020 |
|           | EPI_ISL_1068209 | hCoV-19/Brazil/AM-FIOCRUZ-20891550FA/2020 |
|           | EPI_ISL_1068223 | hCoV-19/Brazil/AM-FIOCRUZ-20892224RM/2020 |
|           | EPI_ISL_1068253 | hCoV-19/Brazil/AM-FIOCRUZ-20895570KS/2020 |
|           | EPI_ISL_1068254 | hCoV-19/Brazil/AM-FIOCRUZ-20895654ID/2020 |
|           | EPI_ISL_1068257 | hCoV-19/Brazil/AM-FIOCRUZ-20898137RM/2020 |
|           | EPI_ISL_1661251 | hCoV-19/Brazil/AM-FIOCRUZ-20842519JC/2020 |
|           | EPI_ISL_2298865 | hCoV-19/Brazil/AM-IEC1200-178756/2020     |
|           | EPI_ISL_801386  | hCoV-19/Brazil/AM-FIOCRUZ-20141882LT/2020 |
|           | EPI_ISL_801387  | hCoV-19/Brazil/AM-FIOCRUZ-20141937RS/2020 |
|           | EPI_ISL_801388  | hCoV-19/Brazil/AM-FIOCRUZ-20141978DR/2020 |

|                 |                                           |
|-----------------|-------------------------------------------|
| EPI_ISL_801389  | hCoV-19/Brazil/AM-FIOCRUZ-20142116AS/2020 |
| EPI_ISL_801390  | hCoV-19/Brazil/AM-FIOCRUZ-20142279MP/2020 |
| EPI_ISL_801391  | hCoV-19/Brazil/AM-FIOCRUZ-20142492MG/2020 |
| EPI_ISL_801392  | hCoV-19/Brazil/AM-FIOCRUZ-20142493RO/2020 |
| EPI_ISL_801393  | hCoV-19/Brazil/AM-FIOCRUZ-20842350OC/2020 |
| EPI_ISL_801394  | hCoV-19/Brazil/AM-FIOCRUZ-20842378LB/2020 |
| EPI_ISL_801395  | hCoV-19/Brazil/AM-FIOCRUZ-20842393GA/2020 |
| EPI_ISL_801396  | hCoV-19/Brazil/AM-FIOCRUZ-20842568SB/2020 |
| EPI_ISL_801397  | hCoV-19/Brazil/AM-FIOCRUZ-20890012JJ/2020 |
| EPI_ISL_801398  | hCoV-19/Brazil/AM-FIOCRUZ-20890013MB/2020 |
| EPI_ISL_801400  | hCoV-19/Brazil/AM-FIOCRUZ-20890114ED/2020 |
| EPI_ISL_801401  | hCoV-19/Brazil/AM-FIOCRUZ-20890117JP/2020 |
| EPI_ISL_833131  | hCoV-19/Brazil/AM-FIOCRUZ-20142761FC/2020 |
| EPI_ISL_833168  | hCoV-19/Brazil/AM-988/2020                |
| EPI_ISL_918512  | hCoV-19/Brazil/AM-IEC-177300/2020         |
| EPI_ISL_925916  | hCoV-19/Brazil/AM-IEC-177299/2020         |
| EPI_ISL_926446  | hCoV-19/Brazil/AM-IEC-177302/2020         |
| EPI_ISL_1161401 | hCoV-19/Brazil/RS-15RSLHCPA/2021          |
| EPI_ISL_1161410 | hCoV-19/Brazil/RS-27HRAFHCPA/2021         |
| EPI_ISL_1161412 | hCoV-19/Brazil/RS-30DGSHCPA/2021          |
| EPI_ISL_1161413 | hCoV-19/Brazil/RS-32MBSHCPA/2021          |
| EPI_ISL_1161415 | hCoV-19/Brazil/RS-40FCZVHCPA/2021         |
| EPI_ISL_1163530 | hCoV-19/Brazil/2PWLHCPA/2021              |
| EPI_ISL_1163709 | hCoV-19/Brazil/RS-28DBCHCPA/2020          |
| EPI_ISL_1163710 | hCoV-19/Brazil/RS-29VDCHCPA/2020          |
| EPI_ISL_1163711 | hCoV-19/Brazil/RS-30HGGHCPA/2020          |
| EPI_ISL_1163713 | hCoV-19/Brazil/RS-34JVSCHCPA/2020         |
| EPI_ISL_1163715 | hCoV-19/Brazil/RS-38TCBHCPA/2020          |
| EPI_ISL_1163716 | hCoV-19/Brazil/RS-39BRMHCPA/2020          |
| EPI_ISL_1163736 | hCoV-19/Brazil/31GGPHCPA/2020             |
| EPI_ISL_1182599 | hCoV-19/Brazil/RS-FUNED-936440/2020       |
| EPI_ISL_1182610 | hCoV-19/Brazil/RS-FUNED-904220/2020       |
| EPI_ISL_1182621 | hCoV-19/Brazil/RS-FUNED-828330/2020       |
| EPI_ISL_1182623 | hCoV-19/Brazil/RS-FUNED-831330/2020       |
| EPI_ISL_1195275 | hCoV-19/Brazil/RS-34614CVL/2020           |



|                 |                                 |
|-----------------|---------------------------------|
| EPI_ISL_1195276 | hCoV-19/Brazil/RS-34618CVL/2020 |
| EPI_ISL_1195277 | hCoV-19/Brazil/RS-30960CVL/2020 |
| EPI_ISL_1195278 | hCoV-19/Brazil/RS-29445CVL/2020 |
| EPI_ISL_1195279 | hCoV-19/Brazil/RS-26873CVL/2020 |
| EPI_ISL_1195280 | hCoV-19/Brazil/RS-27045CVL/2020 |
| EPI_ISL_1195281 | hCoV-19/Brazil/RS-34562CVL/2020 |
| EPI_ISL_1195282 | hCoV-19/Brazil/RS-34490CVL/2020 |
| EPI_ISL_1195283 | hCoV-19/Brazil/RS-34738CVL/2020 |
| EPI_ISL_1195284 | hCoV-19/Brazil/RS-33998CVL/2020 |
| EPI_ISL_1195285 | hCoV-19/Brazil/RS-34366CVL/2020 |
| EPI_ISL_1195286 | hCoV-19/Brazil/RS-34379CVL/2020 |
| EPI_ISL_1195287 | hCoV-19/Brazil/RS-31430CVL/2020 |
| EPI_ISL_1195288 | hCoV-19/Brazil/RS-30556CVL/2020 |
| EPI_ISL_1195289 | hCoV-19/Brazil/RS-30175CVL/2020 |
| EPI_ISL_1195290 | hCoV-19/Brazil/RS-28433CVL/2020 |
| EPI_ISL_1195291 | hCoV-19/Brazil/RS-28044CVL/2020 |
| EPI_ISL_1195292 | hCoV-19/Brazil/RS-27081CVL/2020 |
| EPI_ISL_1195293 | hCoV-19/Brazil/RS-22325CVL/2020 |
| EPI_ISL_1469555 | hCoV-19/Brazil/RS-29850CVL/2020 |
| EPI_ISL_1469560 | hCoV-19/Brazil/RS-11684CVL/2020 |
| EPI_ISL_1469572 | hCoV-19/Brazil/RS-19368CVL/2020 |
| EPI_ISL_1469573 | hCoV-19/Brazil/RS-24944CVL/2020 |
| EPI_ISL_1469576 | hCoV-19/Brazil/RS-13343CVL/2020 |
| EPI_ISL_1469579 | hCoV-19/Brazil/RS-19218CVL/2020 |
| EPI_ISL_1469584 | hCoV-19/Brazil/RS-20017CVL/2020 |
| EPI_ISL_1469586 | hCoV-19/Brazil/RS-26231CVL/2020 |
| EPI_ISL_1469593 | hCoV-19/Brazil/RS-15883CVL/2020 |
| EPI_ISL_1469604 | hCoV-19/Brazil/RS-21234CVL/2020 |
| EPI_ISL_1469608 | hCoV-19/Brazil/RS-34418CVL/2020 |
| EPI_ISL_1469609 | hCoV-19/Brazil/RS-11645CVL/2020 |
| EPI_ISL_1469615 | hCoV-19/Brazil/RS-10594CVL/2020 |
| EPI_ISL_1469620 | hCoV-19/Brazil/RS-18377CVL/2020 |
| EPI_ISL_1469623 | hCoV-19/Brazil/RS-13468CVL/2020 |
| EPI_ISL_1469624 | hCoV-19/Brazil/RS-23278CVL/2020 |
| EPI_ISL_1469625 | hCoV-19/Brazil/RS-8698CVL/2020  |

|                 |                                 |
|-----------------|---------------------------------|
| EPI_ISL_1469629 | hCoV-19/Brazil/RS-19014CVL/2020 |
| EPI_ISL_1469631 | hCoV-19/Brazil/RS-21098CVL/2020 |
| EPI_ISL_1469633 | hCoV-19/Brazil/RS-19973CVL/2020 |
| EPI_ISL_1469636 | hCoV-19/Brazil/RS-34416CVL/2020 |
| EPI_ISL_1469637 | hCoV-19/Brazil/RS-23727CVL/2020 |
| EPI_ISL_1469638 | hCoV-19/Brazil/RS-30570CVL/2020 |
| EPI_ISL_1469641 | hCoV-19/Brazil/RS-34405CVL/2020 |
| EPI_ISL_1469642 | hCoV-19/Brazil/RS-24316CVL/2020 |
| EPI_ISL_1469647 | hCoV-19/Brazil/RS-13263CVL/2020 |
| EPI_ISL_1469656 | hCoV-19/Brazil/RS-5587CVL/2020  |
| EPI_ISL_1469657 | hCoV-19/Brazil/RS-7892CVL/2020  |
| EPI_ISL_1469658 | hCoV-19/Brazil/RS-31603CVL/2020 |
| EPI_ISL_1469661 | hCoV-19/Brazil/RS-21812CVL/2020 |
| EPI_ISL_1469669 | hCoV-19/Brazil/RS-13420CVL/2020 |
| EPI_ISL_1469675 | hCoV-19/Brazil/RS-23455CVL/2020 |
| EPI_ISL_1469677 | hCoV-19/Brazil/RS-22763CVL/2020 |
| EPI_ISL_1469683 | hCoV-19/Brazil/RS-23365CVL/2020 |
| EPI_ISL_1469684 | hCoV-19/Brazil/RS-18354CVL/2020 |
| EPI_ISL_1469687 | hCoV-19/Brazil/RS-21331CVL/2020 |
| EPI_ISL_1469692 | hCoV-19/Brazil/RS-18743CVL/2020 |
| EPI_ISL_1469696 | hCoV-19/Brazil/RS-15273CVL/2020 |
| EPI_ISL_1469704 | hCoV-19/Brazil/RS-30366CVL/2020 |
| EPI_ISL_1469713 | hCoV-19/Brazil/RS-15455CVL/2020 |
| EPI_ISL_1469714 | hCoV-19/Brazil/RS-16305CVL/2020 |
| EPI_ISL_1469719 | hCoV-19/Brazil/RS-30252CVL/2020 |
| EPI_ISL_1469720 | hCoV-19/Brazil/RS-27333CVL/2020 |
| EPI_ISL_1469721 | hCoV-19/Brazil/RS-26493CVL/2020 |
| EPI_ISL_1469722 | hCoV-19/Brazil/RS-25734CVL/2020 |
| EPI_ISL_1469723 | hCoV-19/Brazil/RS-28198CVL/2020 |
| EPI_ISL_1469730 | hCoV-19/Brazil/RS-25360CVL/2020 |
| EPI_ISL_1469731 | hCoV-19/Brazil/RS-18191CVL/2020 |
| EPI_ISL_1469733 | hCoV-19/Brazil/RS-25202CVL/2020 |
| EPI_ISL_1469737 | hCoV-19/Brazil/RS-34631CVL/2020 |
| EPI_ISL_1469740 | hCoV-19/Brazil/RS-29517CVL/2020 |
| EPI_ISL_1469746 | hCoV-19/Brazil/RS-34589CVL/2020 |

|                 |                                         |
|-----------------|-----------------------------------------|
| EPI_ISL_1469748 | hCoV-19/Brazil/RS-4772CVL/2020          |
| EPI_ISL_1469749 | hCoV-19/Brazil/RS-15968CVL/2020         |
| EPI_ISL_1469754 | hCoV-19/Brazil/RS-19441CVL/2020         |
| EPI_ISL_1469774 | hCoV-19/Brazil/RS-31118CVL/2020         |
| EPI_ISL_1469778 | hCoV-19/Brazil/RS-16736CVL/2020         |
| EPI_ISL_1469781 | hCoV-19/Brazil/RS-21394CVL/2020         |
| EPI_ISL_1469783 | hCoV-19/Brazil/RS-15744CVL/2020         |
| EPI_ISL_1469796 | hCoV-19/Brazil/RS-5596CVL/2020          |
| EPI_ISL_1469802 | hCoV-19/Brazil/RS-22236CVL/2020         |
| EPI_ISL_1469803 | hCoV-19/Brazil/RS-16090CVL/2020         |
| EPI_ISL_1469835 | hCoV-19/Brazil/RS-11625CVL/2020         |
| EPI_ISL_1469845 | hCoV-19/Brazil/RS-13095CVL/2020         |
| EPI_ISL_1479121 | hCoV-19/Brazil/RS-26120CVL/2020         |
| EPI_ISL_1799499 | hCoV-19/Brazil/RS-00310HM_LMM52636/2020 |
| EPI_ISL_1799505 | hCoV-19/Brazil/RS-00617HM_LMM52648/2020 |
| EPI_ISL_2249348 | hCoV-19/Brazil/RS-FUNED-104235-21/2020  |
| EPI_ISL_2249352 | hCoV-19/Brazil/RS-FUNED-98672-21/2020   |
| EPI_ISL_2249353 | hCoV-19/Brazil/RS-FUNED-96918-21/2020   |
| EPI_ISL_2249355 | hCoV-19/Brazil/RS-FUNED-401-21/2021     |
| EPI_ISL_2249379 | hCoV-19/Brazil/RS-FUNED-2858-21/2021    |
| EPI_ISL_2249382 | hCoV-19/Brazil/RS-FUNED-1120-21/2021    |
| EPI_ISL_2344429 | hCoV-19/Brazil/RS-L111-CD4046/2020      |
| EPI_ISL_2344433 | hCoV-19/Brazil/RS-L94-CD3012/2020       |
| EPI_ISL_2344454 | hCoV-19/Brazil/RS-L101-CD4037/2020      |
| EPI_ISL_2431429 | hCoV-19/Brazil/RS-LMM45505/2021         |
| EPI_ISL_2431431 | hCoV-19/Brazil/RS-LMM45503/2021         |
| EPI_ISL_2617875 | hCoV-19/Brazil/RS-165_LABRESIS/2020     |
| EPI_ISL_2617876 | hCoV-19/Brazil/RS-166_LABRESIS/2020     |
| EPI_ISL_2617879 | hCoV-19/Brazil/RS-170_LABRESIS/2020     |
| EPI_ISL_729801  | hCoV-19/Brazil/RS-FIOCRUZ-15270/2020    |
| EPI_ISL_729803  | hCoV-19/Brazil/RS-FIOCRUZ-15286/2020    |
| EPI_ISL_729845  | hCoV-19/Brazil/RS-FIOCRUZ-15279/2020    |
| EPI_ISL_729852  | hCoV-19/Brazil/RS-FIOCRUZ-15281/2020    |
| EPI_ISL_729853  | hCoV-19/Brazil/RS-FIOCRUZ-15284/2020    |
| EPI_ISL_729854  | hCoV-19/Brazil/RS-FIOCRUZ-15289/2020    |

|                |                                      |
|----------------|--------------------------------------|
| EPI_ISL_729856 | hCoV-19/Brazil/RS-FIOCRUZ-15275/2020 |
| EPI_ISL_729861 | hCoV-19/Brazil/RS-FIOCRUZ-15292/2020 |
| EPI_ISL_770555 | hCoV-19/Brazil/RS-00603/2020         |
| EPI_ISL_770558 | hCoV-19/Brazil/RS-00606/2020         |
| EPI_ISL_770562 | hCoV-19/Brazil/RS-00610/2020         |
| EPI_ISL_770569 | hCoV-19/Brazil/RS-00617/2020         |
| EPI_ISL_770572 | hCoV-19/Brazil/RS-00620/2020         |
| EPI_ISL_770573 | hCoV-19/Brazil/RS-00622/2020         |
| EPI_ISL_770576 | hCoV-19/Brazil/RS-00626/2020         |
| EPI_ISL_770577 | hCoV-19/Brazil/RS-00627/2020         |
| EPI_ISL_770582 | hCoV-19/Brazil/RS-00634/2020         |
| EPI_ISL_770585 | hCoV-19/Brazil/RS-00637/2020         |
| EPI_ISL_770586 | hCoV-19/Brazil/RS-00638/2020         |
| EPI_ISL_770588 | hCoV-19/Brazil/RS-00640/2020         |
| EPI_ISL_770590 | hCoV-19/Brazil/RS-00643/2020         |
| EPI_ISL_770597 | hCoV-19/Brazil/RS-00652/2020         |
| EPI_ISL_770599 | hCoV-19/Brazil/RS-00654/2020         |
| EPI_ISL_770600 | hCoV-19/Brazil/RS-00656/2020         |
| EPI_ISL_770601 | hCoV-19/Brazil/RS-00657/2020         |
| EPI_ISL_770608 | hCoV-19/Brazil/RS-00666/2020         |
| EPI_ISL_770609 | hCoV-19/Brazil/RS-00667/2020         |
| EPI_ISL_770610 | hCoV-19/Brazil/RS-00668/2020         |
| EPI_ISL_770611 | hCoV-19/Brazil/RS-00669/2020         |
| EPI_ISL_770614 | hCoV-19/Brazil/RS-00673/2020         |
| EPI_ISL_770615 | hCoV-19/Brazil/RS-00674/2020         |
| EPI_ISL_770623 | hCoV-19/Brazil/RS-00685/2020         |
| EPI_ISL_770626 | hCoV-19/Brazil/RS-00690/2020         |
| EPI_ISL_770627 | hCoV-19/Brazil/RS-00691/2020         |
| EPI_ISL_770629 | hCoV-19/Brazil/RS-00693/2020         |
| EPI_ISL_779156 | hCoV-19/Brazil/RS-00602/2020         |
| EPI_ISL_779160 | hCoV-19/Brazil/RS-00641/2020         |
| EPI_ISL_779161 | hCoV-19/Brazil/RS-00644/2020         |
| EPI_ISL_779162 | hCoV-19/Brazil/RS-00658/2020         |
| EPI_ISL_779163 | hCoV-19/Brazil/RS-00664/2020         |
| EPI_ISL_779165 | hCoV-19/Brazil/RS-00677/2020         |

|           |                 |                                              |
|-----------|-----------------|----------------------------------------------|
|           | EPI_ISL_779166  | hCoV-19/Brazil/RS-00678/2020                 |
|           | EPI_ISL_779167  | hCoV-19/Brazil/RS-00687/2020                 |
|           | EPI_ISL_779168  | hCoV-19/Brazil/RS-00688/2020                 |
|           | EPI_ISL_831688  | hCoV-19/Brazil/RS-15371/2020                 |
|           | EPI_ISL_831689  | hCoV-19/Brazil/RS-19337/2020                 |
|           | EPI_ISL_831938  | hCoV-19/Brazil/RS-24565/2020                 |
|           | EPI_ISL_832009  | hCoV-19/Brazil/RS-27623/2020                 |
|           | EPI_ISL_832011  | hCoV-19/Brazil/RS-31786/2020                 |
|           | EPI_ISL_930857  | hCoV-19/Brazil/RS-33704/2020                 |
|           | EPI_ISL_942898  | hCoV-19/Brazil/RS-38343/2020                 |
|           | EPI_ISL_943581  | hCoV-19/Brazil/RS-36765/2020                 |
|           | EPI_ISL_943584  | hCoV-19/Brazil/RS-36850/2020                 |
|           | EPI_ISL_943606  | hCoV-19/Brazil/RS-82912/2020                 |
|           | EPI_ISL_943609  | hCoV-19/Brazil/RS-83041/2020                 |
| Dataset C | EPI_ISL_1034304 | hCoV-19/Brazil/AM-FIOCRUZ-21140415MR-R2/2021 |
|           | EPI_ISL_1034306 | hCoV-19/Brazil/AM-FIOCRUZ-21140646MJ-R2/2021 |
|           | EPI_ISL_1068110 | hCoV-19/Brazil/AM-FIOCRUZ-20143088ER/2020    |
|           | EPI_ISL_1068111 | hCoV-19/Brazil/AM-FIOCRUZ-20143093FL/2020    |
|           | EPI_ISL_1068112 | hCoV-19/Brazil/AM-FIOCRUZ-20143105JJ/2020    |
|           | EPI_ISL_1068114 | hCoV-19/Brazil/AM-FIOCRUZ-20143297CR/2020    |
|           | EPI_ISL_1068149 | hCoV-19/Brazil/AM-FIOCRUZ-20843185MR/2020    |
|           | EPI_ISL_1068150 | hCoV-19/Brazil/AM-FIOCRUZ-20843187NC/2020    |
|           | EPI_ISL_1068151 | hCoV-19/Brazil/AM-FIOCRUZ-20843198JS/2020    |
|           | EPI_ISL_1068154 | hCoV-19/Brazil/AM-FIOCRUZ-20843278FR/2020    |
|           | EPI_ISL_1068156 | hCoV-19/Brazil/AM-FIOCRUZ-20843312KD/2020    |
|           | EPI_ISL_1068157 | hCoV-19/Brazil/AM-FIOCRUZ-20843348JS/2020    |
|           | EPI_ISL_1068158 | hCoV-19/Brazil/AM-FIOCRUZ-20843351MC/2020    |
|           | EPI_ISL_1068159 | hCoV-19/Brazil/AM-FIOCRUZ-20843355YM/2020    |
|           | EPI_ISL_1068160 | hCoV-19/Brazil/AM-FIOCRUZ-20843374ML/2020    |
|           | EPI_ISL_1068169 | hCoV-19/Brazil/AM-FIOCRUZ-20890057CR/2020    |
|           | EPI_ISL_1068198 | hCoV-19/Brazil/AM-FIOCRUZ-20891068DS/2020    |
|           | EPI_ISL_1068221 | hCoV-19/Brazil/AM-FIOCRUZ-20892199FT/2020    |
|           | EPI_ISL_1068222 | hCoV-19/Brazil/AM-FIOCRUZ-20892204FL/2020    |
|           | EPI_ISL_1068225 | hCoV-19/Brazil/AM-FIOCRUZ-20892251AR/2020    |
|           | EPI_ISL_1068226 | hCoV-19/Brazil/AM-FIOCRUZ-20892262DR/2020    |

|                 |                                           |
|-----------------|-------------------------------------------|
| EPI_ISL_1068243 | hCoV-19/Brazil/AM-FIOCRUZ-20893866MN/2020 |
| EPI_ISL_1068248 | hCoV-19/Brazil/AM-FIOCRUZ-20894927MS/2020 |
| EPI_ISL_1068249 | hCoV-19/Brazil/AM-FIOCRUZ-20895217CM/2020 |
| EPI_ISL_1068256 | hCoV-19/Brazil/AM-FIOCRUZ-20897269OP/2020 |
| EPI_ISL_1068258 | hCoV-19/Brazil/AM-FIOCRUZ-21142481RG/2021 |
| EPI_ISL_1068260 | hCoV-19/Brazil/AM-FIOCRUZ-21143321SM/2021 |
| EPI_ISL_1068261 | hCoV-19/Brazil/AM-FIOCRUZ-21143333CC/2021 |
| EPI_ISL_1068262 | hCoV-19/Brazil/AM-FIOCRUZ-21143339MM/2021 |
| EPI_ISL_1068263 | hCoV-19/Brazil/AM-FIOCRUZ-21143395RC/2021 |
| EPI_ISL_1068264 | hCoV-19/Brazil/AM-FIOCRUZ-21143402KJ/2021 |
| EPI_ISL_1068266 | hCoV-19/Brazil/AM-FIOCRUZ-21143420WC/2021 |
| EPI_ISL_1068268 | hCoV-19/Brazil/AM-FIOCRUZ-21143455VM/2021 |
| EPI_ISL_1068269 | hCoV-19/Brazil/AM-FIOCRUZ-21143459HF/2021 |
| EPI_ISL_1068270 | hCoV-19/Brazil/AM-FIOCRUZ-21143496CM/2021 |
| EPI_ISL_1068271 | hCoV-19/Brazil/AM-FIOCRUZ-21143504VA/2021 |
| EPI_ISL_1068272 | hCoV-19/Brazil/AM-FIOCRUZ-21143537SL/2021 |
| EPI_ISL_1068273 | hCoV-19/Brazil/AM-FIOCRUZ-21143541HC/2021 |
| EPI_ISL_1068274 | hCoV-19/Brazil/AM-FIOCRUZ-21143575RS/2021 |
| EPI_ISL_1068275 | hCoV-19/Brazil/AM-FIOCRUZ-21143580DO/2021 |
| EPI_ISL_1068276 | hCoV-19/Brazil/AM-FIOCRUZ-21143603CF/2021 |
| EPI_ISL_1068278 | hCoV-19/Brazil/AM-FIOCRUZ-21143608MV/2021 |
| EPI_ISL_1068279 | hCoV-19/Brazil/AM-FIOCRUZ-21843439LC/2021 |
| EPI_ISL_1068280 | hCoV-19/Brazil/AM-FIOCRUZ-21843511WC/2021 |
| EPI_ISL_1068281 | hCoV-19/Brazil/AM-FIOCRUZ-21843518RA/2021 |
| EPI_ISL_1068282 | hCoV-19/Brazil/AM-FIOCRUZ-21843667JC/2021 |
| EPI_ISL_1068283 | hCoV-19/Brazil/AM-FIOCRUZ-21843677AF/2021 |
| EPI_ISL_1068284 | hCoV-19/Brazil/AM-FIOCRUZ-21843807PS/2021 |
| EPI_ISL_1068285 | hCoV-19/Brazil/AM-FIOCRUZ-21890002SP/2021 |
| EPI_ISL_1068286 | hCoV-19/Brazil/AM-FIOCRUZ-21890006JG/2021 |
| EPI_ISL_1068287 | hCoV-19/Brazil/AM-FIOCRUZ-21890017IF/2021 |
| EPI_ISL_1068288 | hCoV-19/Brazil/AM-FIOCRUZ-21890017MD/2021 |
| EPI_ISL_1068289 | hCoV-19/Brazil/AM-FIOCRUZ-21890025RM/2021 |
| EPI_ISL_1068290 | hCoV-19/Brazil/AM-FIOCRUZ-21890031RC/2021 |
| EPI_ISL_1068291 | hCoV-19/Brazil/AM-FIOCRUZ-21890365EC/2021 |
| EPI_ISL_1068292 | hCoV-19/Brazil/AM-FIOCRUZ-21890474MD/2021 |

|                 |                                              |
|-----------------|----------------------------------------------|
| EPI_ISL_1166615 | hCoV-19/Brazil/RN-IEC-177512/2021            |
| EPI_ISL_1213190 | hCoV-19/Brazil/AM-00701/2021                 |
| EPI_ISL_1213202 | hCoV-19/Brazil/AM-00700/2021                 |
| EPI_ISL_1213204 | hCoV-19/Brazil/AM-00702/2021                 |
| EPI_ISL_1213206 | hCoV-19/Brazil/AM-00703/2021                 |
| EPI_ISL_1239012 | hCoV-19/Brazil/AM-FIOCRUZ-IAM1504/2021       |
| EPI_ISL_1261122 | hCoV-19/Brazil/AM-FIOCRUZ-20897281WS/2020    |
| EPI_ISL_1261123 | hCoV-19/Brazil/AM-FIOCRUZ-21840593CL/2021    |
| EPI_ISL_1261683 | hCoV-19/Brazil/AM-IEC-177881/2021            |
| EPI_ISL_1261685 | hCoV-19/Brazil/AM-IEC-177889/2021            |
| EPI_ISL_1261690 | hCoV-19/Brazil/AM-IEC-178078/2021            |
| EPI_ISL_1261694 | hCoV-19/Brazil/AM-IEC-177911/2021            |
| EPI_ISL_1402431 | hCoV-19/Brazil/AM-FIOCRUZ-3521-1P/2021       |
| EPI_ISL_1708318 | hCoV-19/Brazil/AM-M1-CAMPI231I/2020          |
| EPI_ISL_2241532 | hCoV-19/Brazil/PE-BA1200-260461726/2021      |
| EPI_ISL_2241605 | hCoV-19/Brazil/AM-BA1200-260461655/2021      |
| EPI_ISL_2298850 | hCoV-19/Brazil/AM-IEC1200-178727/2020        |
| EPI_ISL_2298852 | hCoV-19/Brazil/AM-IEC1200-178729/2020        |
| EPI_ISL_2298854 | hCoV-19/Brazil/AM-IEC1200-178730/2021        |
| EPI_ISL_2298856 | hCoV-19/Brazil/AM-IEC1200-178732/2021        |
| EPI_ISL_2298867 | hCoV-19/Brazil/AM-IEC1200-178766/2020        |
| EPI_ISL_2298871 | hCoV-19/Brazil/AM-IEC1200-178768/2020        |
| EPI_ISL_2466265 | hCoV-19/Brazil/AM-FIOCRUZ-34077-1P/2020      |
| EPI_ISL_2488774 | hCoV-19/Brazil/AM-IEC-177910/2021            |
| EPI_ISL_2488775 | hCoV-19/Brazil/AM-IEC-178063/2021            |
| EPI_ISL_2499748 | hCoV-19/Brazil/AM-M2-CAMPI311/2021           |
| EPI_ISL_811149  | hCoV-19/Brazil/AM-FIOCRUZ-20143138FN-R2/2020 |
| EPI_ISL_833136  | hCoV-19/Brazil/AM-FIOCRUZ-20143103JT/2020    |
| EPI_ISL_833137  | hCoV-19/Brazil/AM-FIOCRUZ-20842882CA/2020    |
| EPI_ISL_833138  | hCoV-19/Brazil/AM-FIOCRUZ-20843201ML/2020    |
| EPI_ISL_833139  | hCoV-19/Brazil/AM-FIOCRUZ-20843228ZC/2020    |
| EPI_ISL_833140  | hCoV-19/Brazil/AM-FIOCRUZ-20843269RC/2020    |
| EPI_ISL_833167  | hCoV-19/Brazil/AM-987/2020                   |
| EPI_ISL_833169  | hCoV-19/Brazil/AM-989/2020                   |
| EPI_ISL_833171  | hCoV-19/Brazil/AM-991/2020                   |

|                 |                                   |
|-----------------|-----------------------------------|
| EPI_ISL_833172  | hCoV-19/Brazil/AM-992/2020        |
| EPI_ISL_833173  | hCoV-19/Brazil/AM-993/2020        |
| EPI_ISL_833174  | hCoV-19/Brazil/AM-994/2020        |
| EPI_ISL_906069  | hCoV-19/Brazil/AM-1035/2021       |
| EPI_ISL_906071  | hCoV-19/Brazil/AM-1062/2021       |
| EPI_ISL_906075  | hCoV-19/Brazil/AM-1031/2021       |
| EPI_ISL_906076  | hCoV-19/Brazil/AM-1036/2021       |
| EPI_ISL_906077  | hCoV-19/Brazil/AM-1037/2021       |
| EPI_ISL_906080  | hCoV-19/Brazil/AM-1047/2021       |
| EPI_ISL_906081  | hCoV-19/Brazil/AM-1048/2021       |
| EPI_ISL_918499  | hCoV-19/Brazil/AM-IEC-177290/2020 |
| EPI_ISL_918500  | hCoV-19/Brazil/AM-IEC-177291/2020 |
| EPI_ISL_918501  | hCoV-19/Brazil/AM-IEC-177292/2020 |
| EPI_ISL_918502  | hCoV-19/Brazil/AM-IEC-177293/2020 |
| EPI_ISL_918503  | hCoV-19/Brazil/AM-IEC-177294/2020 |
| EPI_ISL_918504  | hCoV-19/Brazil/AM-IEC-177301/2020 |
| EPI_ISL_918505  | hCoV-19/Brazil/AM-IEC-177310/2020 |
| EPI_ISL_918506  | hCoV-19/Brazil/AM-IEC-177312/2020 |
| EPI_ISL_918507  | hCoV-19/Brazil/AM-IEC-177314/2021 |
| EPI_ISL_918508  | hCoV-19/Brazil/AM-IEC-177320/2021 |
| EPI_ISL_918509  | hCoV-19/Brazil/AM-IEC-177322/2021 |
| EPI_ISL_918510  | hCoV-19/Brazil/AM-IEC-177323/2021 |
| EPI_ISL_918511  | hCoV-19/Brazil/AM-IEC-177328/2020 |
| EPI_ISL_940614  | hCoV-19/Brazil/AM-1059/2021       |
| EPI_ISL_940615  | hCoV-19/Brazil/AM-1060/2021       |
| EPI_ISL_940616  | hCoV-19/Brazil/AM-1061/2021       |
| EPI_ISL_940617  | hCoV-19/Brazil/AM-1063/2021       |
| EPI_ISL_940618  | hCoV-19/Brazil/AM-1064/2021       |
| EPI_ISL_940620  | hCoV-19/Brazil/AM-1066/2021       |
| EPI_ISL_940623  | hCoV-19/Brazil/AM-1069/2021       |
| EPI_ISL_940624  | hCoV-19/Brazil/AM-1070/2021       |
| EPI_ISL_940626  | hCoV-19/Brazil/AM-1073/2021       |
| EPI_ISL_940627  | hCoV-19/Brazil/AM-1074/2021       |
| EPI_ISL_943990  | hCoV-19/Brazil/AM-1192/2021       |
| EPI_ISL_1121316 | hCoV-19/Brazil/RS-1769/2021       |



|           |                 |                                         |
|-----------|-----------------|-----------------------------------------|
|           | EPI_ISL_1630158 | hCoV-19/Brazil/RS-LMM38991/2020         |
|           | EPI_ISL_2038957 | hCoV-19/Brazil/RS-FIOCRUZ-7363/2021     |
|           | EPI_ISL_2249369 | hCoV-19/Brazil/RS-FUNED-6924-21/2021    |
| Dataset D | EPI_ISL_1821208 | hCoV-19/Brazil/SP-2389/2020             |
|           | EPI_ISL_2241496 | hCoV-19/Brazil/PB-BA1200-250009713/2020 |
|           | EPI_ISL_2249440 | hCoV-19/Brazil/RJ-FUNED-330105720/2020  |
|           | EPI_ISL_2249444 | hCoV-19/Brazil/RJ-FUNED-330107714/2020  |
|           | EPI_ISL_2344420 | hCoV-19/Brazil/PR-L119-CD7789/2020      |
|           | EPI_ISL_2614541 | hCoV-19/Brazil/GO-2732R1/2021           |

## Supplementary Figures

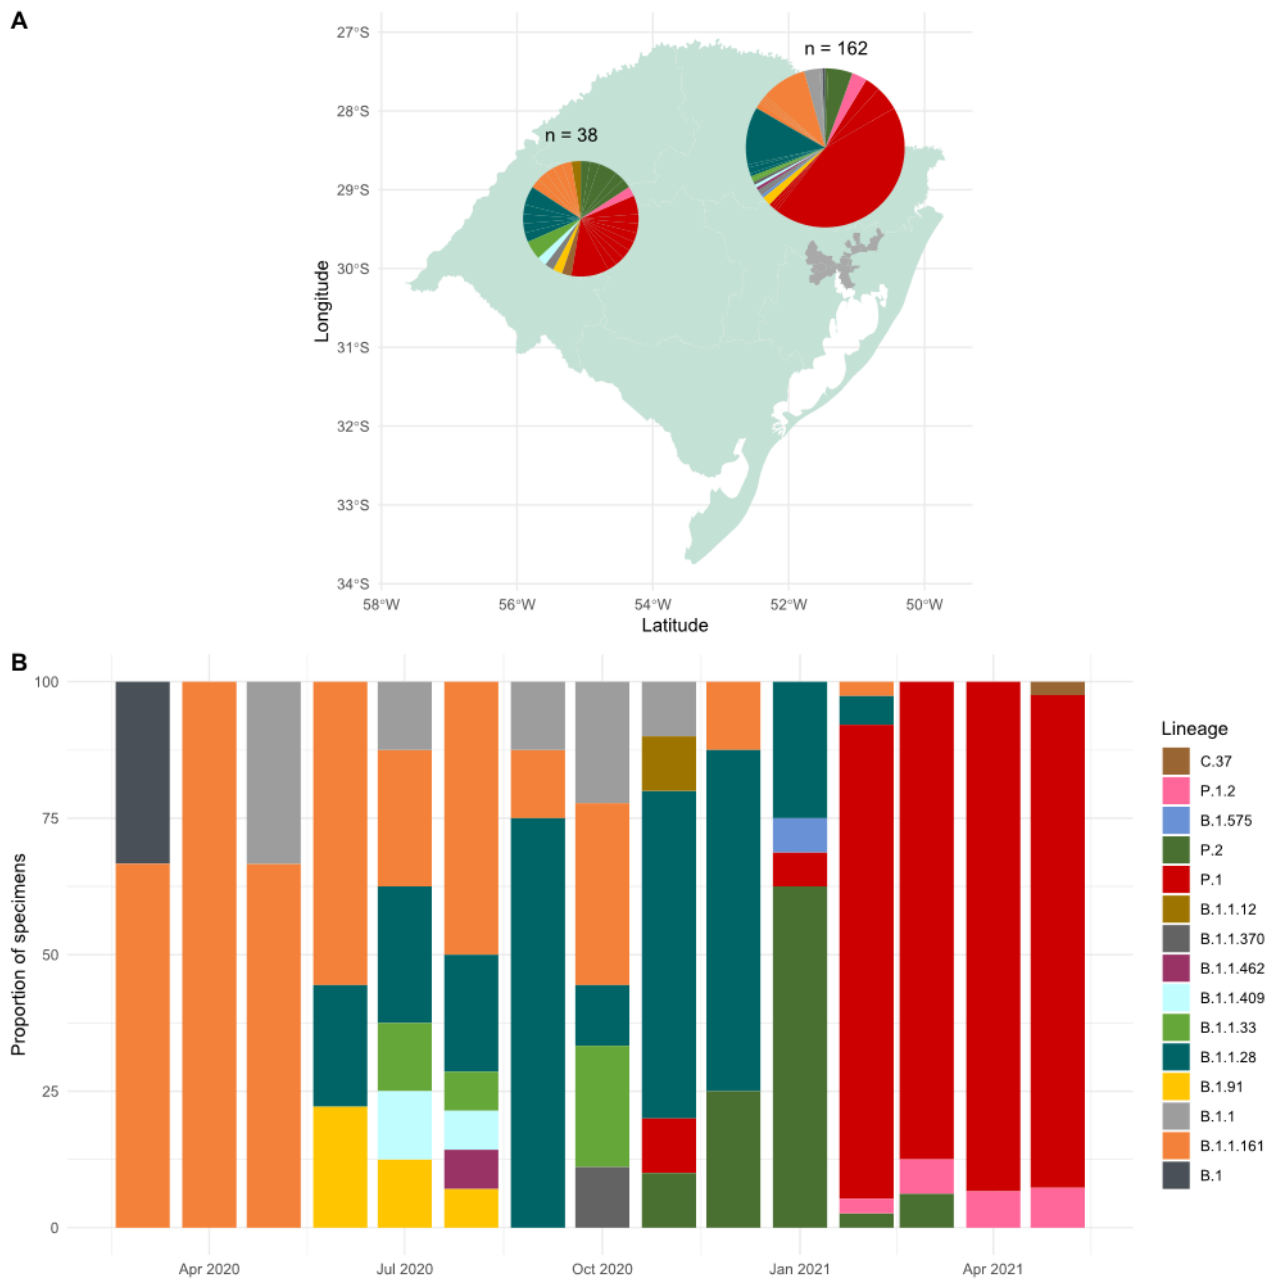

**Figure S1.** Distribution of SARS-CoV-2 lineages across specimens from COVID-19 cases collected during distinct periods of the study, Rio Grande do Sul state, Southern Brazil, March 2020 to May 2021 (n = 200 specimens). A) Map of Rio Grande do Sul with Porto Alegre and metropolitan area highlighted. B) Distribution of SARS-CoV-2 lineages in Rio Grande do Sul, across the sampling period.

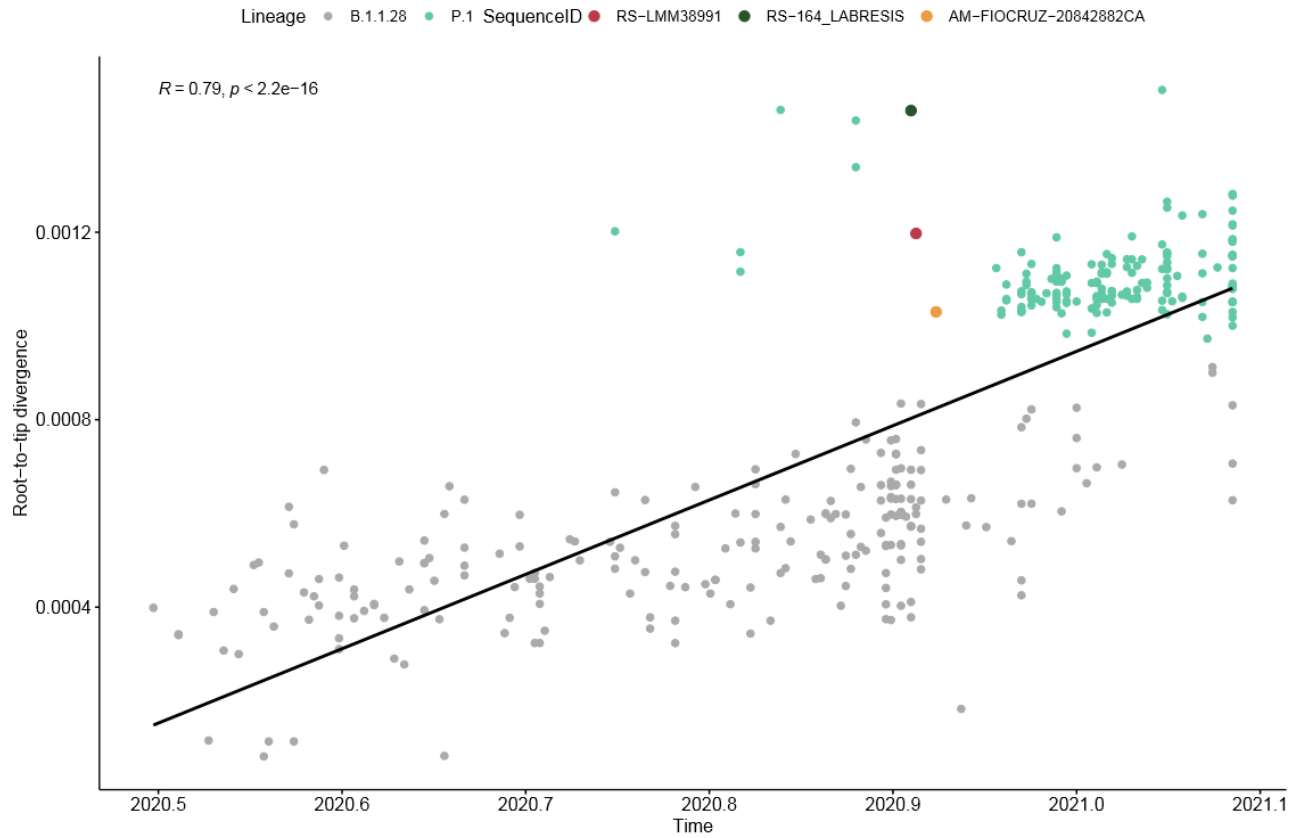

**Figure S2.** Root-to-tip regression of genetic distances and sampling dates for dataset A, B, C and D (n=389). Correlation coefficient is depicted above the graph. The sequences RS-LMM38991 (red) and RS-164\_LABRESIS (dark green), both from Rio Grande do Sul, and the sequence AM-FIOCRUZ-20842882CA (orange) from Amazonas are highlighted in different colors as they are the oldest P.1 specimens in their states.

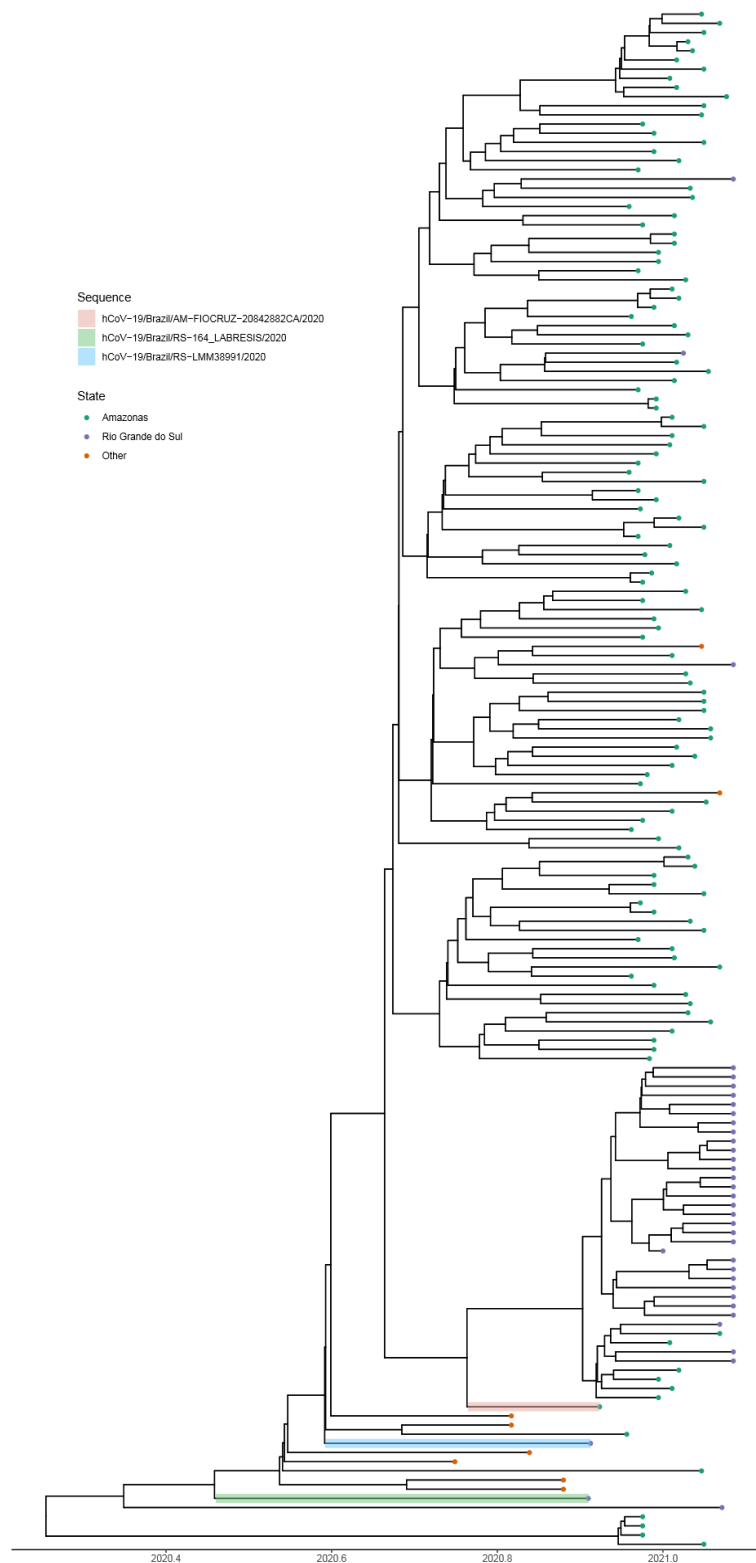

**Figure S3.** Time-scaled and reconstruction of the maximum clade credibility tree for all datasets in this study (n=389). The B.1.1.28 lineage was collapsed for best visualization. The tip of each sequence was colored to represent the different regions: Amazonas (green), Rio Grande do Sul (purple) and from other states (orange). The sequences 164\_LABRESIS (RS) and RS-LMM38991 (EPI\_ISL\_1630158), both from Southern Brazil, and the sequence AM-FIOCRUZ-20842882CA (EPI\_ISL\_833137), from Northern Brazil, were highlighted in different colors as they are the older P.1 sequences.

## References

1. Wink PL, Volpato F, Lima-Morales D, Paiva RM, Willig JB, Bock H, De-Paris F, Barth AL. 2021. RT-qPCR half reaction optimization for the detection of SARS-CoV-2. medRxiv 05(19)21257470. doi: 10.1101/2021.05.19.21257470
2. Pangolin: lineage assignment in an emerging pandemic as an epidemiological tool. [v3.0.2]. Available from: <http://pangolin.cog-uk.io>. Accessed 21 July, 2021
3. Rambaut A, Holmes EC, O'Toole A, Hill V, McCrone JT, Ruis C, Plessis L, Pybus OG. 2020. A dynamic nomenclature proposal for SARS-CoV-2 lineages to assist genomic epidemiology. *Nat Microbiol* 5:1403-1407. doi:10.1038/s41564-020-0770-5
4. Nextclade - Clade assignment, mutation calling, and sequence quality checks [v1.5.2]. Available from: <https://clades.nextstrain.org>. Accessed 21 July, 2021
5. Minh BQ, Schmidt HA, Chernomor O, Schrempf D, Woodhams MD, Haeseler A, Lanfear R. 2020. IQ-TREE 2: New Models and Efficient Methods for Phylogenetic Inference in the Genomic Era. *Mol Biol Evol* 37(5):1530-1534. doi: 10.1093/molbev/msaa015
6. Kalyaanamoorthy S, Minh BQ, Wong TKF, von Haeseler A, Jermin LS. 2017. ModelFinder: fast model selection for accurate phylogenetic estimates. *Nat Methods* 14:587-589. doi:10.1038/nmeth.4285
7. Rambaut A, Lam TT, Carvalho LM, Pybus OG. 2016. Exploring the temporal structure of heterochronous sequences using TempEst (formerly Path-O-Gen). *Virus Evol* 2(1)1:7. doi: 10.1093/ve/vew007
8. Bouckaert R, Vaughan TG, Barido-Sottani J, Duchêne S, Fourment M, Gavryushkina A, Heled J, Jones F, Kuhnert D, Mario N, Matschiner M, Mendes FK, müller NF, Ogilvie HA, Plessis L, Poppinga A, Rambaut A, Rasmussen D, Siveroni I, Suchard MA, Wu CH, Xie D, Zhang C, Stadler T, Drummond AJ. 2019. BEAST 2.5: An Advanced software platform for Bayesian evolutionary analysis. *Plos Comput Biol* 15(4):e1006650. doi: 10.1371/journal.pcbi.1006650
9. Drummond AJ, Rambaut A, Shapiro B, Olyson OG. 2005. Bayesian coalescent inference of past population dynamics from molecular sequences. *Mol Biol Evol* 22(5):1185-1192. doi:10.1093/molbev/msi103
10. Rambaut A, Drummond AJ, Xie D, Baele G, Suchard MA. 2018. Posterior summarization in Bayesian Phylogenetics using Tracer 1.7. *Syst Biol* 67(5):901-904. Doi: 10.1093/sysbio/syy032
11. Ishikawa SA, Zhukova A, Iwasaki W, Gascuel O. 2019. A Fast Likelihood Method to Reconstruct and Visualize Ancestral Scenarios. *Mol Biol Evol* 36:2069–2085. <https://doi.org/10.1093/MOLBEV/MSZ131>
12. Letunic I, Bork P. Interactive Tree Of Life (iTOL) v4: recent updates and new developments. 2019. *Nucleic Acids Res* 47:W256–W259. <https://doi.org/10.1093/NAR/GKZ239>
13. Guangchuan Yu, David Smith, Huachen Zhu, Yi Guan, Tommy Tsan-Yuk Lam. 2017. ggtree: an R package for visualization and annotation of phylogenetic trees with their covariates and other associated data. *Methods Ecol and Evol* 8(1):28-36. doi:10.1111/2041-210X.12628
14. Wang LG, Lam TTY, Xu S, Dai Z, Zhou L, Feng T, Guo P, Dunn CW, Jones BR, Bradley T, Zhu H, Guan Y, Jiang Y, Yu G. 2020. treeio: an R package for phylogenetic tree input and output with richly annotated and associated data. *Mol Biol and Evol* 37(2):599-603. doi: 10.1093/molbev/msz240

15. Wickham H. 2016. ggplot2: Elegant Graphics for Data Analysis. Springer-Verlag New York. ISBN 978-3-319-24277-4. Available from: <https://ggplot2.tidyverse.org>. Accessed 21 July, 2021
16. Pereira RHM, Gonçalves CN, et al. 2019. geobr: Loads Shapefiles of Official Spatial Data Sets of Brazil. Available from: GitHub repository - <https://github.com/ipeaGIT/geobr>. Accessed 21 July, 2021
17. Wickham H, François R, Henry L, Müller K. 2021. dplyr: A Grammar of Data Manipulation. R package version 1.0.6. Available from: <https://CRAN.R-project.org/package=dplyr>. Accessed 21 July, 2021
